# Supplementary material
Source: Springer Nature journal article supplement (https://www.springermedizin.de/resource/supplementary/13012_2011_466_MOESM3_ESM.pdf/9630032)

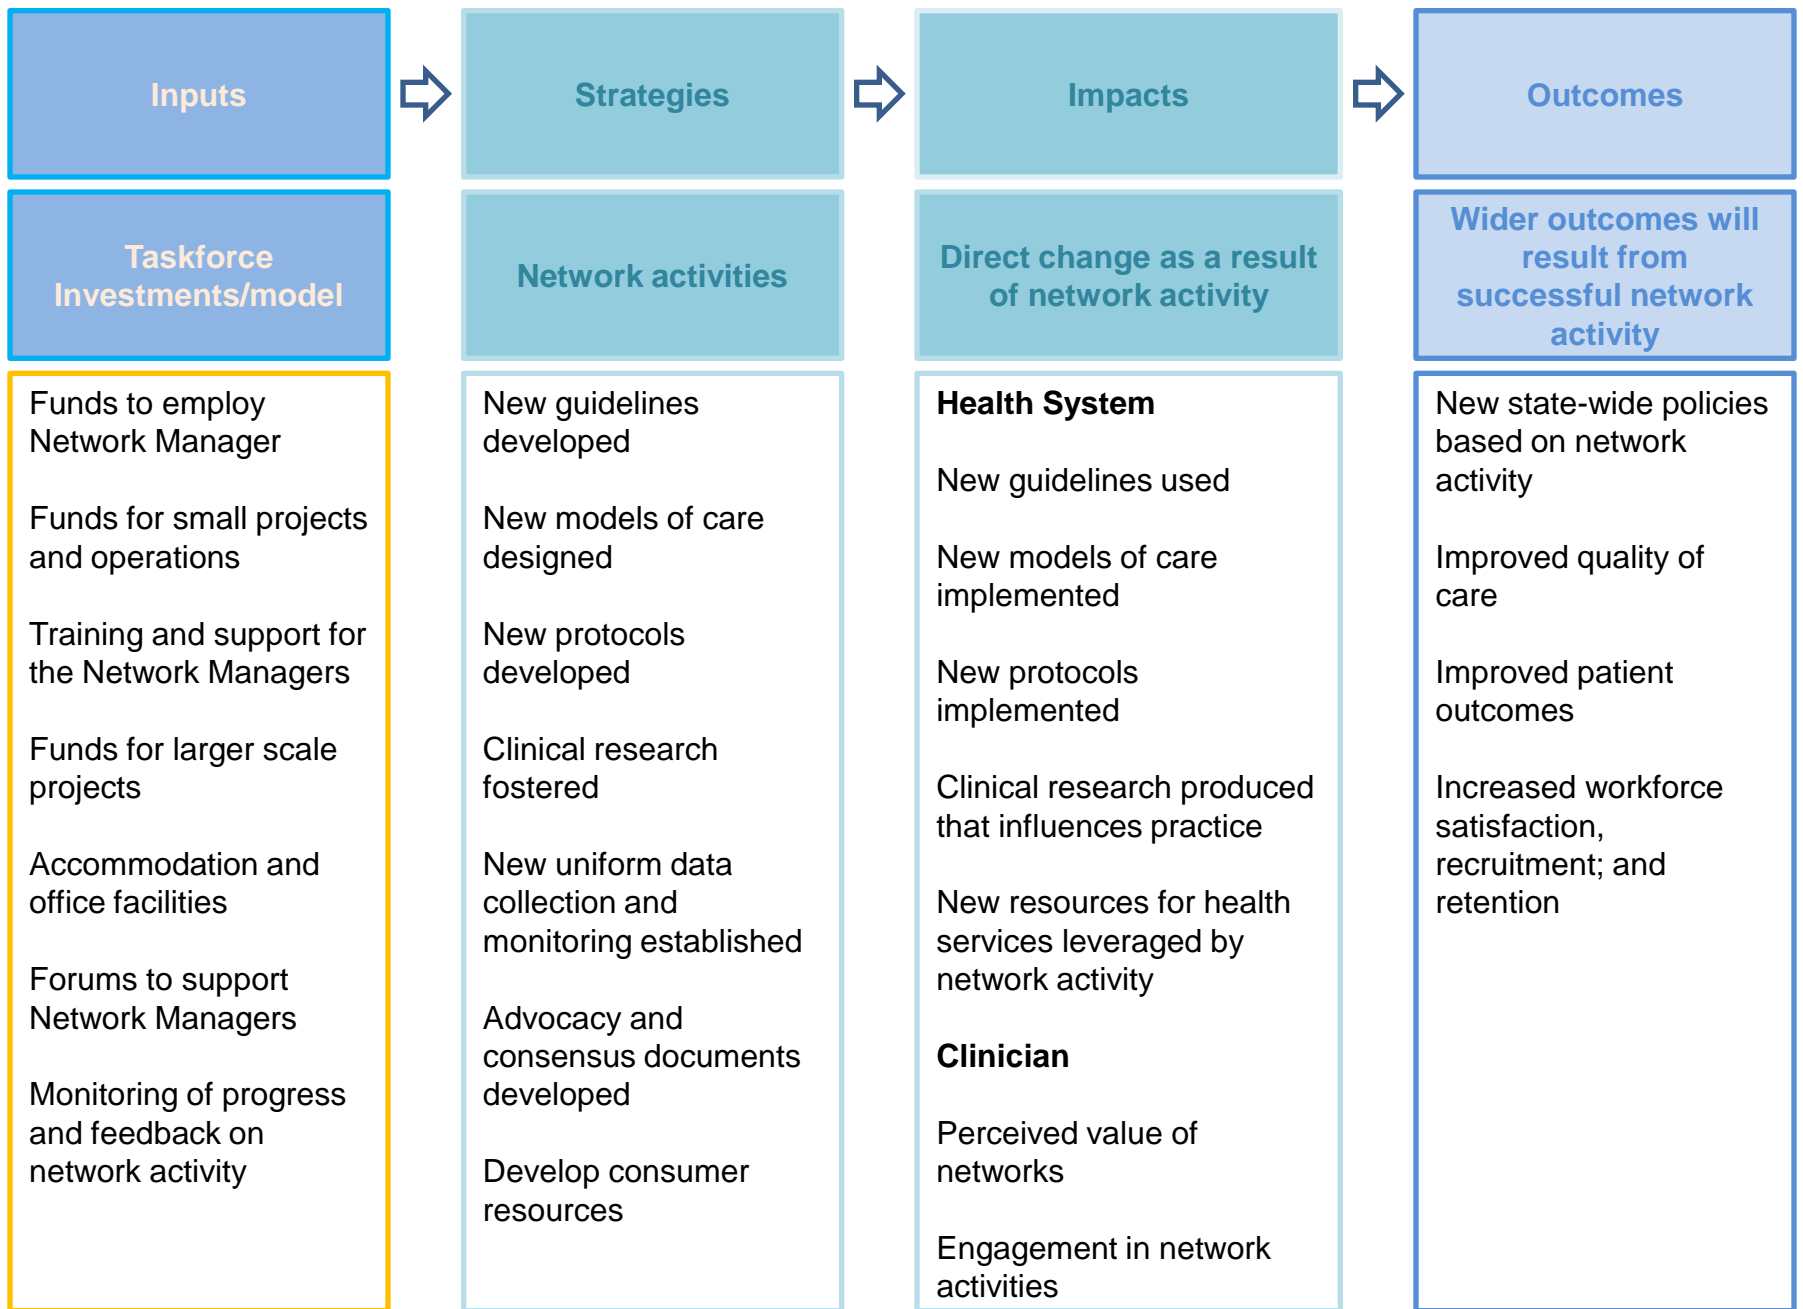

NSW= New South Wales

Supplement: MOESM3 [file 9630032]
